# Supplementary material
Source: PubMed Central journal article supplement (PMC3664264)
Supplement: NIHMS438743-supplement-01.pdf [file NIHMS438743-supplement-01.pdf]

## SUPPLEMENTARY MATERIALS

**Figure S1:** Sanger sequencing validation of 9 non-*TGFBR1* variants identified in Scottish MSSE families with common ancestry

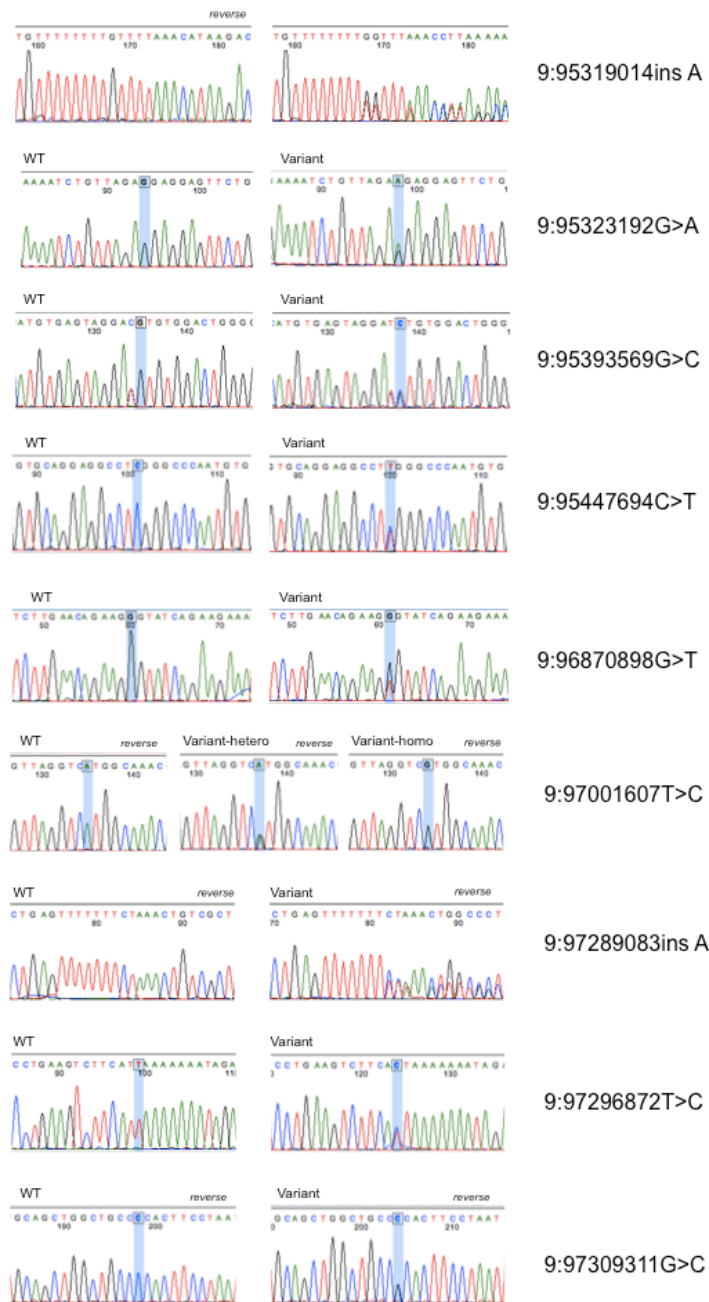

**Figure S2:** Sanger sequencing validation of 8 variants identified in Scottish family 17

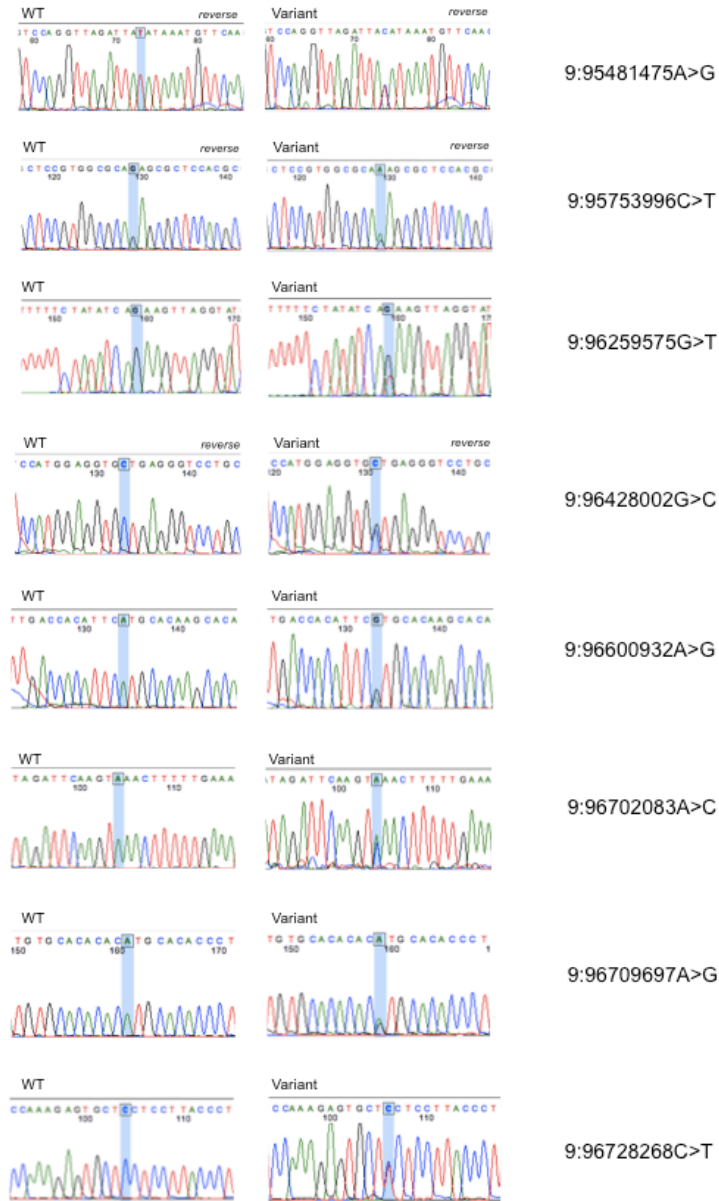

**Figure S3:** Sanger sequencing validation of 7 variants identified in Scottish family 15

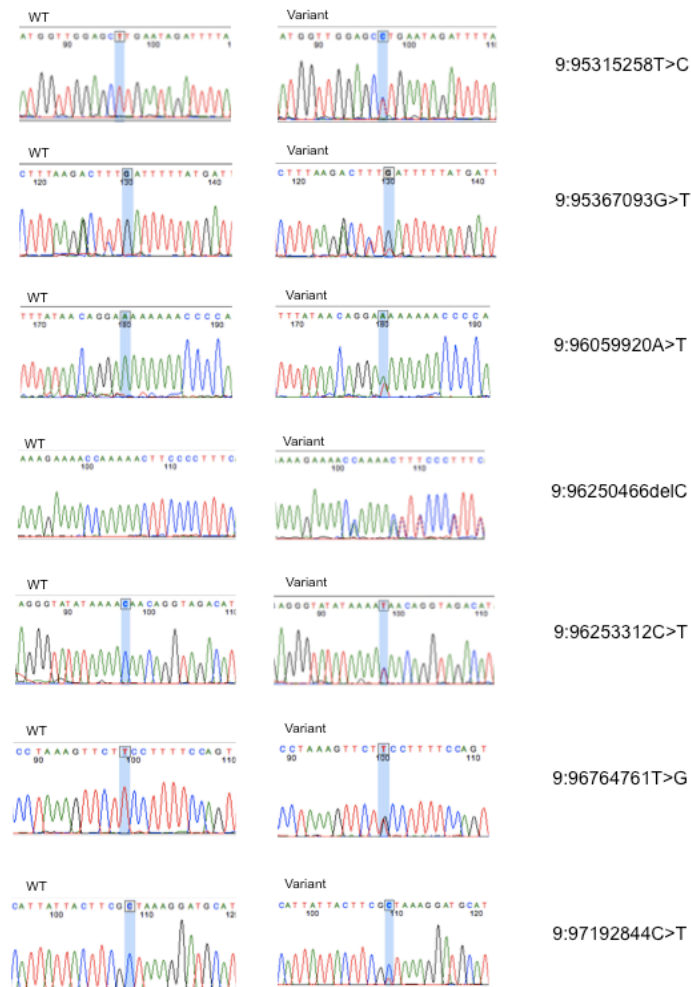

**Table S1:** Summary of 13 MSSE families available in this study

| Family no. <sup>1</sup> | <i>TGFBR1</i> mutation <sup>1</sup> | Shared 9q22.3 haplotype <sup>1</sup> | 9 rare variants at non- <i>TGFBR1</i> locus | Sequencing (n) <sup>2</sup> |
|-------------------------|-------------------------------------|--------------------------------------|---------------------------------------------|-----------------------------|
| 1                       | p.C41Y                              | No                                   | No                                          | Sanger <sup>3</sup> (1)     |
| 2                       | p.N45S                              | Yes, but diverged                    | Yes                                         | Sanger (1)                  |
| 3                       | c.134-135insA                       | No                                   | No                                          | Illumina <sup>4</sup> (1)   |
| 4                       | p.G52R                              | Yes                                  | Yes                                         | Illumina (3), Sanger (4)    |
| 5                       | p.G52R                              | Yes                                  | Yes                                         | Illumina (1), Sanger (3)    |
| 6                       | p.G52R                              | Yes                                  | Yes                                         | Illumina (1)                |
| 7                       | p.G52R                              | Yes                                  | Yes                                         | Sanger (1)                  |
| 9                       | p.G52R                              | Yes                                  | Yes                                         | Illumina (1)                |
| 13                      | p.W242X                             | No                                   | No                                          | Illumina (1), Sanger (1)    |
| 14                      | c.806-2A>C                          | No                                   | No                                          | Illumina (1)                |
| 15                      | c.980delC                           | No                                   | No                                          | Illumina (2)                |
| 17                      | c.1059_1062delA<br>CTGinsCAATAA     | No                                   | No                                          | Illumina (2)                |
| 18                      | p.R414X                             | Yes, but diverged                    | Yes                                         | Illumina (1), Sanger (2)    |

Abbreviations: no., number

<sup>1</sup>Goudie et al., Nature Genetics, 2011

<sup>2</sup>Indicates the number of affected individuals sequenced

<sup>3</sup>Sequenced by Sanger dideoxy sequencing

<sup>4</sup>First, sequenced by Illumina Genome Analyzer II and confirmed by Sanger dideoxy sequencing

**Table S2:** Seven MSSE-associated non-*TGFBR1* rare variants identified in Scottish family 15

| Chr Positions |          | Gene             | Region     | W | V                  | Family 15 |         | Normal<br>(n=162) <sup>2</sup> |
|---------------|----------|------------------|------------|---|--------------------|-----------|---------|--------------------------------|
| (NCBI36)      | (GRCh37) |                  |            |   |                    | MA-BM     | MA-1803 |                                |
| 95315258      | 96275437 | <i>FAM120A</i>   | intronic   | T | C <sup>1</sup>     | T/C       | T/C     | 1/162                          |
| 95367093      | 96327272 | <i>FAM120A</i>   | 3'UTR      | G | T                  | G/T       | G/T     | 0/160                          |
| 96059920      | 97020099 | <i>LOC158257</i> | ncRNA      | A | T                  | A/T       | A/T     | 0/162                          |
| 96250466      | 97210646 | <i>HIATL1</i>    | intronic   | C | del C <sup>1</sup> | C/-       | C/-     | 5/160                          |
| 96253312      | 97213491 | <i>HIATL1</i>    | intronic   | C | T                  | C/T       | C/T     | 0/162                          |
| 96764761      | 97724940 | <i>C9orf3</i>    | intronic   | T | G <sup>1</sup>     | T/G       | T/G     | 9/162                          |
| 97192844      | 98153023 | NA               | intergenic | C | T <sup>1</sup>     | C/T       | C/T     | 1/162                          |

Abbreviations: Chr, chromosome; UTR, untranslated region; 1000G; 1000 Genomes, W, wild-type; V, variant

<sup>1</sup>Variants are reported in 1000 Genome (<http://www.1000genomes.org>).

<sup>2</sup>162 unrelated healthy normal controls from Scottish population

**Table S3:** Eight MSSE-associated non-*TGFBR1* rare variants identified in Scottish family 17

| Chr Positions |          | Gene          | Region   | W | V              | Family 17 |      |      |       | Normal<br>(N=162) <sup>2</sup> |
|---------------|----------|---------------|----------|---|----------------|-----------|------|------|-------|--------------------------------|
| (NCBI36)      | (GRCh37) |               |          |   |                | LE-3      | LE-4 | LE-5 | LE-94 |                                |
| 95481475      | 96441654 | <i>PHF2</i>   | 3'UTR    | A | G              | A/A       | A/G  | A/G  | A/G   | 1/150                          |
| 95753996      | 96714175 | <i>BARX1</i>  | 3'UTR    | C | T              | C/C       | C/T  | C/T  | C/T   | 1/160                          |
| 96259575      | 97219754 | <i>HIATL1</i> | intronic | G | T              | G/T       | G/T  | G/T  | G/T   | 1/162                          |
| 96428002      | 97388181 | <i>FBP1</i>   | intronic | G | C              | G/C       | G/C  | G/C  | G/C   | 1/154                          |
| 96600932      | 97561111 | <i>C9orf3</i> | intronic | A | G <sup>1</sup> | A/G       | A/G  | A/G  | A/G   | 5/148                          |
| 96702083      | 97662262 | <i>C9orf3</i> | intronic | A | C              | A/C       | A/C  | A/C  | A/C   | 1/161                          |
| 96709697      | 97669876 | <i>C9orf3</i> | intronic | A | G <sup>1</sup> | A/G       | A/G  | A/G  | A/G   | 4/160                          |
| 96728268      | 97688447 | <i>C9orf3</i> | intronic | C | T <sup>1</sup> | C/T       | C/T  | C/T  | C/T   | 4/160                          |

Abbreviations: Chr, chromosome; UTR, untranslated region; 1000G; 1000 Genomes, W, wild-type; V, variant

<sup>1</sup>Variants are reported in 1000 Genome (<http://www.1000genomes.org>).

<sup>2</sup>162 unrelated healthy normal controls from Scottish population

One healthy unrelated individual from Scotland has all 8 variants identified in Family 17.

**Table S4:** Primer sequences used for sequencing 9 rare variants identified in Scottish MSSE families with common ancestry

| Primer name | Sequence (5' to 3')       |
|-------------|---------------------------|
| 95319014F   | CCCAAGCAAAACCCTAGAAA      |
| 95319014R   | AGGAAAAGATCACCTGCTTCA     |
| 95323192F   | TTGGATGAGTTGTTTCAGTGTCTTT |
| 95323192R   | TTCCAACAGGTTTCACCTTCA     |
| 95393569F   | TTTGAAAGGAAGATGTAATGAAA   |
| 95393569R   | CCAGGGTCTGGAGTCTTCCT      |
| 95447694F   | GCTGCTCTATCGTCCCATT       |
| 95447694R   | TGCACAGTGGTGGGTGTC        |
| 96870898F   | GCCTGTGTCTTTCCTAAAAGTTG   |
| 96870898R   | ACGCACACTGAGGCCTAAAA      |
| 97001607F   | CACCCCTCCATTCAACAAAT      |
| 97001607R   | AAGCCTTCCCAGGATTGACT      |
| 97289083F   | CGCTGTTCCCAGTCCTTATT      |
| 97289083R   | CTCCCCCACTCCACAGTCTA      |
| 97296872F   | GGCTGGATAATGGCAAGAAG      |
| 97296872R   | AGAACCCAGGAACCAACACA      |
| 97309311F   | ATGTGTGGAATCCAGGGAAG      |
| 97309311R   | AGCGCTCTTTGGAACAACAT      |

**Table S5:** Genes located in the SRH locus

| Gene symbol         | Chr | start position | stop position | size (bp) | Description                                                       |
|---------------------|-----|----------------|---------------|-----------|-------------------------------------------------------------------|
| <i>FAM120A</i>      | 9   | 95,253,994     | 95,368,218    | 114,224   | family with sequence similarity 120A                              |
| <i>PHF2</i>         | 9   | 95,378,730     | 95,481,690    | 102,960   | PHD finger protein 2                                              |
| <i>BARX1</i>        | 9   | 95,753,730     | 95,757,429    | 3,699     | BARX homeobox 1                                                   |
| <i>PTPDC1</i>       | 9   | 95,832,897     | 95,911,957    | 79,060    | protein tyrosine phosphatase domain containing 1                  |
| <i>CYCSP24</i>      | 9   | 95,840,133     | 95,840,448    | 315       | cytochrome c, somatic pseudogene 24                               |
| <i>MIRNLET7A1</i>   | 9   | 95,978,059     | 95,978,138    | 79        | microRNA let-7a-1                                                 |
| <i>MIRNLET7F1</i>   | 9   | 95,978,449     | 95,978,535    | 86        | microRNA let-7f-1                                                 |
| <i>LOC158257</i>    | 9   | 95,978,561     | 96,061,936    | 83,375    | hypothetical protein LOC158257                                    |
| <i>MIRNLET7D</i>    | 9   | 95,980,936     | 95,981,022    | 86        | microRNA let-7d                                                   |
| <i>ZNF169</i>       | 9   | 96,061,399     | 96,105,112    | 43,713    | zinc finger protein 169                                           |
| <i>FAM22F</i>       | 9   | 96,120,299     | 96,130,747    | 10,448    | family with sequence similarity 22, member F                      |
| <i>LOC100132077</i> | 9   | 96,141,005     | 96,162,011    | 21,006    | hypothetical protein LOC100132077                                 |
| <i>LOC728026</i>    | 9   | 96,148,562     | 96,150,667    | 2,105     | hypothetical protein LOC728026                                    |
| <i>HIATL1</i>       | 9   | 96,176,654     | 96,263,023    | 86,369    | hippocampus abundant transcript-like 1                            |
| <i>LOC100132600</i> | 9   | 96,234,734     | 96,235,317    | 583       | hypothetical LOC100132600                                         |
| <i>FBP2</i>         | 9   | 96,360,823     | 96,395,896    | 35,073    | fructose-1,6-bisphosphatase 2                                     |
| <i>FBP1</i>         | 9   | 96,405,236     | 96,441,624    | 36,388    | fructose-1,6-bisphosphatase 1                                     |
| <i>C9orf3</i>       | 9   | 96,528,815     | 96,889,262    | 360,447   | chromosome 9 open reading frame 3                                 |
| <i>LOC728061</i>    | 9   | 96,863,820     | 96,866,034    | 2,214     | hCG2003663                                                        |
| <i>MIRN23B</i>      | 9   | 96,887,310     | 96,887,406    | 96        | microRNA 23b                                                      |
| <i>MIRN27B</i>      | 9   | 96,887,547     | 96,887,643    | 96        | microRNA 27b                                                      |
| <i>MIRN24-1</i>     | 9   | 96,888,123     | 96,888,190    | 67        | microRNA 24-1                                                     |
| <i>FANCC</i>        | 9   | 96,901,157     | 97,119,812    | 218,655   | Fanconi anemia, complementation group C                           |
| <i>LOC643342</i>    | 9   | 97,094,441     | 97,097,142    | 2,701     | similar to ATM/ATR-Substrate Chk2-Interacting Zn2+-finger protein |
| <i>LOC100132148</i> | 9   | 97,190,452     | 97,213,751    | 23,299    | hypothetical protein LOC100132148                                 |
| <i>MT1P1</i>        | 9   | 97,215,122     | 97,215,720    | 598       | metallothionein 1 pseudogene 1                                    |
| <i>PTCH1</i>        | 9   | 97,245,085     | 97,319,068    | 73,983    | patched homolog 1 (Drosophila)                                    |
| <i>LOC100130840</i> | 9   | 97,308,338     | 97,309,739    | 1,401     | hypothetical protein LOC100130840                                 |
| <i>PSMA7P</i>       | 9   | 97,454,864     | 97,455,469    | 605       | proteasome (prosome, macropain) subunit, alpha type, 7 pseudogene |

NCBI36/hg18



## **SUPPLEMENTARY INFORMATION: Materials and Methods**

### *MSSE patients and DNA extraction*

13 MSSE families with 27 affected members included in our study were part of 22 MSSE families members previously described in Goudie *et al.* 2011. DNAs were extracted from either peripheral blood leucocytes or immortalized lymphoblastoid cell lines from patients using standard protocol. Informed consent was obtained from all members of families 2, 4-10, 12, and 15-18 in compliance with local ethical review board requirements. Samples from members of families 1, 3, 11, 13 and 14 were collected with consent for diagnostic testing for Ferguson-Smith disease including haplotype analysis and as such were exempted from specific ethical board review. Normal control DNAs were obtained from Dr. Malcolm Dunlop for Scottish population and CEPH registry. This study was performed with approval of the UCSF Committee On Human Research and conducted according to Declaration of Helsinki Principles.

### *Targeted next-generation sequencing*

RNA oligonucleotides to capture the ~2.2-Mb target region (chr9: 95,253,994-97,455,469 NCBI36/hg18) on chromosome 9q22-31 were designed by e-Array (Agilent Technologies, Santa Clara, CA, USA). Sample libraries were generated according to Agilent SureSelect Target Enrichment kit manual. Amplified captured libraries were sequenced on an Illumina GA II platform (Illumina Inc., San Diego, CA, USA) in UCSF Genome Core Facility. The raw sequencing data were retrieved from the Illumina GA II pipelines.

### *Sanger dideoxy sequencing*

All rare variants listed in Table 1, Tables S2, and S3 were validated by Sanger sequencing (Quintara Biosciences, Albany, CA, USA). The sequencing was performed on both strands. Primer sequences for 9 rare variants shared by Scottish families 2, 4-7, 9, and 18 were designed by Primer 3 (version 0.4.0.) and described in Table 4S.

### *Electromobility Shift Assay (EMSA) and supershift Assay*

EMSA was performed using the Lightshift Chemiluminescent EMSA kit according to manufacturer's instruction (Pierce, Rockford, IL, USA). Biotin-labeled and unlabeled oligonucleotides for *PTCH1* variant 97309311G>C (5'-CTGAATTAGGAAGTGGGGCAGCCAGC-3' and 5'-GCTGGCTGCCCACTTCCTAATTCAG-3' for wild-type 97309311G; 5'-CTGAATTAGGAAGTGCGGCAGCCAGC-3' and 5'-GCTGGCTGCCGCACTTCCTAATTCAG-3' for variant 97309311C) were synthesized (Sigma, St. Louis, MO, USA). EMSA binding reaction consists of 1X binding buffer, 2.5% glycerol, 5mM MgCl<sub>2</sub>, 50 ng/uL of poly (dIdC), 0.05% NP40, 7ug of nuclear extract, and 60 fmol of biotin-labeled target DNA. For competition assay, unlabeled target probe was added at 100X and 50X concentration of labeled target probe. The reactions were incubated at room temperature for 20 minutes. For supershift assay, nuclear extract was pre-incubated with 2 µg of SP1 and PU.1 antibodies on ice for 30 minutes. Reactions were electrophoresed on pre-run 6% polyacrylamide gel and transferred onto nylon membrane followed by UV cross-linking. Biotin-labeled target DNA were detected by detection module and exposed to X-ray film.

### *Bioinformatic analysis*

Reads were aligned to the NCBI36/hg18 build of the Human genome using the BWA aligner version 0.5.9 (Li, 2009). Sequences were re-aligned to improve indel calling using the Genome Analysis Toolkit (GATK) (DePristo *et al.*, 2011), and variants were called simultaneously using the GATK Universal Genotyper method. Minor allele frequency (MAF) in normal controls was calculated by Haploview 4.2 (Barrett *et al.*, 2005).

Barrett JC, Fry B, Maller J *et al.* (2005) Haploview: analysis and visualization of LD and haplotype maps. *Bioinformatics* 21:263-5

DePristo MA, Banks E, Poplin R *et al.* (2011) A framework for variation discovery and genotyping using next-generation DNA sequencing data. *Nat Genet* 43:491-8

Li H, Durbin R. (2009) Fast and accurate short read alignment with Burrows-Wheeler transform. *Bioinformatics* 25:1754-60
